# 1 **Does metal pollution affect stoichiometry of soil-litter food webs?**

2 *Michel Asselman<sup>1</sup>, Łukasz Sobczyk<sup>1</sup> January Weiner<sup>1</sup>, Stefan Scheu<sup>2</sup> and Anna Rozen<sup>1\*</sup>*

3 <sup>1</sup> Institute of Environmental Sciences, Jagiellonian University, Gronostajowa 7, 30-387  
4 Kraków, Poland

5 <sup>2</sup> J-F-Blumenbach Institute of Zoology and Anthropology, Georg August University Göttingen,  
6 Berliner Straße 28, 37073 Göttingen, Germany

7 \*) Corresponding author: [anna.rozen@uj.edu.pl](mailto:anna.rozen@uj.edu.pl)

## 8 **Abstract**

9 To date the field of ecological stoichiometry has focused mainly on aquatic systems  
10 concentrating on macro-elements. We investigated terrestrial systems and included micro-  
11 elements to study the elemental transfer in the detritivorous food web. We compared food  
12 webs of six sites differing in the type and degree of metal pollution along two forest transects  
13 contaminated with copper or zinc. We measured 11 elements in litter, herbivores,  
14 detritivores, predators and omnivores. Based on elemental concentrations of elements  
15 differences between trophic groups were visualized using PCA. At all sites litter C:N, C:P,  
16 C:K and C:Na ratios were higher than in animals. Invertebrate trophic groups were  
17 significantly different from each other in C:Cu, C:Zn and C:Ca ratios. The calculated  
18 resource:consumer N:P ratio suggests that invertebrates in studied forests are N limited and  
19 not P limited. Similar patterns at all sites suggests that metal pollution at the studied intensity  
20 slightly affects the transfer of elements in the terrestrial macro-invertebrate food web.

21 **Keywords**

22 litter invertebrates; food web; ecological stoichiometry, metal pollution; elemental limitation

23

## 24 **Introduction**

25 Since the work of Lindeman (1942) the flow of energy through food webs has been an  
26 important aspect of ecology. Energy is counted only in Joules, hence Hessen et al. (2004)  
27 suggested that it would be more convenient to use carbon (C) as a currency for the flow of  
28 both energy and matter at the same time. Further C can be measured together with other  
29 biological key elements such as e.g. N, P, Fe, Zn, Cu, K, Na. Among other elements crucial  
30 for organism functioning are those which are necessary to build tissues of organisms like  
31 nitrogen and phosphorus, and other which are constituents of enzymes (e.g. Fe, Zn, Cu, Mn,  
32 Ca, Mg) or are involved in other processes (e.g. K, Na). When the total amount of elements  
33 has been measured within different compartments of an ecosystem, the relative abundance of  
34 these elements can be used as determinants of ecosystem processes. The field of ecology

35 dealing with these relative abundances of elements is called “ecological stoichiometry”  
36 (Sterner and Elser, 2002).

37 Stoichiometric differences between different groups of invertebrates are relatively small,  
38 compared to the differences between animals and plants (Cease and Elser, 2013). This could  
39 result in the largest elemental differences at the first trophic link, from plant/detritus to  
40 herbivores/detritivores and a lesser one between herbivores and predators (Bradshaw et al.,  
41 2012). Even though there have been great advances in the field of ecological stoichiometry,  
42 much still need to be unfolded. Studies until today mainly focused on macro-elements (C, N,  
43 P), and were conducted mostly in aquatic environments. Studies on multi-elemental and multi  
44 species/trophic level such as Karimi and Folt (2006), Bradshaw et al. (2012), Filipiak and  
45 Weiner (2014), Filipiak et al. (2016) are scarce.

46 Essential metals such as copper and zinc have been mainly studied as pollutant and but  
47 received little attention from a nutritional point of view as microelements stoichiometrically  
48 interacting with other macro- and microelements . Zn and Cu are important key constituents  
49 of enzymes and proteins, however, they were taken into account first of all in the field of  
50 stress ecology and ecotoxicology because of the negative effects of high doses of these  
51 elements on living organisms (Tyler 1984). Literature data show that growth of individuals is  
52 negatively affected by metals (e.g. Donker et al.,1993, Rozen, 2006). Body composition and  
53 stoichiometry are related to ontogeny (Boros et al., 2015) what suggest possible impact of  
54 metals on body stoichiometry of invertebrates.

55 The interaction between elements has been studied in regard to the uptake by plants  
56 (Siedlecka, 1995), revealing that changes in availability of each group can affect the uptake  
57 of the other (Lin and Wu, 1994; Liu et al., 2003; Chen et al., 2007; Peng et al, 2008). In the  
58 detritivorous food web, litter decay processes and metal accumulation in invertebrates have  
59 so far mainly been linked to soil type, soil metal concentration and dominant tree species,  
60 including their effect on chemical composition of leaf litter (Vesterdal, 1999; Sariyildiz et al.,  
61 2005).

62 It has been shown in the previous studies on metal pollution transect in Olkusz forest that the  
63 metal pollution has negative effects upon litter soil invertebrates: their density ( Enchytraeids  
64 - Tosza et al. 2010), sensitivity to additional stressor (Carabid beetles - Stone et al., 2001,  
65 Łagisz and Laskowski, 2007), however, a positive correlation has also been found between  
66 metal concentration and body mass of beetles (Zygmunt et al., 2007). The studies concerning  
67 the effect of pollution on microbial communities in the above mentioned transects did not  
68 bring any clear answer (Stefanowicz et al., 2007, Chodak et al., 2013). The response of

69 invertebrates to heavy metals (accumulation in the body) depends on various factors: habitat,  
70 diet, physiological response and therefore various taxonomic groups differ in the ability to  
71 accumulate and eliminate metals (Gall et al., 2015).

72 Our hypothesis was that the costs of detoxification (e.g. production of metallothioneins,  
73 storage of metals in granules, increased release of metals in excess) in heavy polluted sites  
74 will cause higher energetic costs (decrease of fat reserves) resulting in changes in  
75 concentrations of other elements, especially the ones engaged in energetic processes (Mn, Fe,  
76 P), and will affect the ratios between elements e.g. C:N ratio or N:P ratio. Our question is  
77 whether any differences between trophic groups exist in body composition and stoichiometry  
78 due to metal pollution.

79

## 80 Methods and Materials

81 Two metal polluted areas were chosen on the base of previous studies: the zinc polluted  
82 Olkusz region in southern Poland and the copper polluted Legnica region in Western Poland  
83 (Niklińska et al., 2006).

84 In the both polluted areas transects of sites differing in metal pollution have been established  
85 (from heavy polluted to reference). Especially intensively studied was the Olkusz Forest,  
86 yielding numerous papers concerning litter decomposition (Niklińska et al., 2005; Niklińska  
87 et al., 2006), litter fauna (Tosza et al., 2010), microorganisms (Niklińska et al., 2005;  
88 Niklińska et al., 2006; Chodak et al., 2013). Similar data on Głogów Forest are available as  
89 well (Niklińska et al., 2006; Stefanowicz et al., 2008; Chodak et al., 2013).

90 The Olkusz region received large inputs of zinc since the medieval period due to ore mining  
91 activities and since the 1960s from two large zinc smelters, which produced ca.  $118 \text{ t} \times \text{m}^{-2}$   
92 of smelter dust. It causes that the Zinc concentrations in soil/litter locally exceed  $4600 \text{ mg} \times$   
93  $\text{kg}^{-1}$  (Niklińska et al., 2005; Niklińska et al., 2006). On the other hand, the Głogów area is the  
94 major copper producing center in Poland. There are two copper smelters and four copper ore  
95 mines in the area causing copper concentrations in soil/litter up to  $1200 \text{ mg} \times \text{kg}^{-1}$  (Niklińska  
96 et al., 2006).

97 In the forests of the both areas the main tree species is *Pinus sylvestris*, admixed with a small  
98 number of other tree species (*Quercus* sp. and *Betula* sp.). The soils are sandy, podzolized  
99 and acidic. The sites near Olkusz have well developed mor humus layers (5 cm) which are  
100 much thinner at the sites near Głogów (1-2 cm). In the Transects with three sites each were  
101 determined in each of the both regions (Olkusz and Głogów) to represent various levels of  
102 pollution (heavy polluted -H, moderately polluted - M and reference -R). The reference sites

103 in both transects were established in similar forest types, distant from pollution sources, with  
104 a background concentration of heavy metals. Coordinates of the sites and their distance to the  
105 smelters are given in Table 1.

106 The climate of both areas is temperate, with mean annual temperature 8.0°C (Olkusz) and  
107 8.9°C (Głogów), and annual average precipitation 600-700 mm (Olkusz) and 500-550mm  
108 (Głogów) (Chodak et al., 2013).

109 The litter layer was sampled at four locations per site in June 2011 at the Olkusz sites (OH –  
110 Olkusz heavy polluted, OM – Olkusz moderately polluted, OR – Olkusz reference site) and  
111 June 2012 at the Głogów sites (GH – Głogów heavy polluted, GM – Głogów moderately  
112 polluted, GR – Głogów reference site). Litter was collected from the forest floor, mixing  
113 freshly fallen and partially decomposed litter. In the laboratory samples were dried using a  
114 vacuum drier at 50 °C for 48 h, ground and stored frozen at -20 °C in an airtight container  
115 until further use.

116 To collect macro invertebrates, 500 pitfall traps were placed at each site in the soil at 1 m  
117 from one another. Traps consisted of two 200 ml plastic cups one in another, filled with 100  
118 ml of 70 % ethanol (EtOH). A 10 cm diameter lid was placed  $\pm 2$  cm above each trap to  
119 prevent dilution by rainfall. Invertebrates were collected from the traps daily, and EtOH was  
120 replaced every other day for a period of 14 days during June 2011 in Olkusz and June 2012 in  
121 Głogów. Ethanol was chosen as a trapping liquid in pitfall traps as it was shown not to have  
122 any significant effects on invertebrates' body stoichiometry during short time (3 days)  
123 exposition (Rožen et al., 2015).

124 In the laboratory, animals were sorted to the lowest taxonomic level (species or morpho-  
125 species). In the present study only individuals with specified taxonomic and trophic position  
126 have been included, provided that sufficient material for analysis of multiple samples per  
127 group (see supplement 1 for number of animals per taxonomic level used) was available.  
128 Animals were rinsed with deionized water to eliminate dust on the body and dried using a  
129 lyophilizer (Christ BETA2-8 LDplus, Martin Christ Getrieffrocknungsanlagen GmbH,  
130 Germany) at -30 °C (37 Pa) for 24 h and -76 °C (0.1 Pa) for 12 h and then stored at -20 °C in  
131 airtight containers until further use.

132 Prior to analyses, samples of animals and litter were homogenized and lyophilized at -30 °C  
133 for 24 h (37 Pa) once more to eliminate any moisture taken up from the atmosphere during  
134 the process of homogenization. C and N contents were examined using a CHNS analyzer  
135 (Vario EL III Elemental Analyzer, Elementar Analysensysteme GmbH, Germany). For other  
136 elements (Na, Mg, P, K, Ca, Mn, Fe, Cu, Zn) samples were prepared using digestion bombs

137 (Heinrichs et al., 1986). Approximately 100 mg of animal or litter sample was digested using  
138 2 ml 65 % Suprapur® nitric acid (Sigma-Aldrich) in Teflon containers and pressure digested  
139 for 9 h in 185 °C. Samples were filtered and rinsed with deionized water into 50 ml  
140 volumetric flasks. Elemental concentrations were then measured using an Inductively  
141 Coupled Plasma Analyzer (Optima 5300DV ICP-OES, Perkin Elmer, Rodgau, Germany).  
142 Measurements were recalculated to milligrams per kilogram dry weight. As a reference  
143 material we used sulfanilic acid for C and N analysis, and Certified Reference Materials  
144 (bush – NCS DC 733348, chicken – NCS ZC73016 and pork muscle – NCS ZC 81001) for  
145 other elements.

146 Based on current understanding of the taxonomy and species interactions (Chen and Wise,  
147 1999; Ponsard and Ardit, 2000; Scheu and Falca, 2000; Laroche, 1990; El-Danasoury,  
148 2016), invertebrates were grouped into the following categories: (1) herbivores feeding on  
149 living plant material (2) detritivores feeding on dead plant material in the litter layer, (3)  
150 omnivores that have variable diets (animals with admixture of plant material), and (4)  
151 predators with prey sources (Supplement 1); litter was assumed the basal resource of the  
152 detritus based food web.

153

## 154 **Statistical analysis**

155 Differences between metal concentrations in litter and in invertebrates from various localities  
156 were compared using a one-way ANOVA with Tukey's HSD post-hoc test. If the data did not  
157 meet normality and homogeneity of variance, we used nonparametric test (Kruskal-Wallis).

158 To analyze the differences between trophic groups with regard to all analyzed elements, we  
159 performed a principal component analysis (PCA) on the correlation matrices.

160 All statistical analyses were performed using Statistica 10.0 (StatSoft Inc.).

161 The stoichiometric ratios are reported as molar ratios.

162

## 163 **Results**

164 Elemental concentration in litter.

165 Along the zinc pollution gradient in litter originating from the Olkusz sites the OH  
166 site contained significantly ( $F_{2,10}=512$ ,  $p<0.0001$ ) more zinc ( $449 \text{ mg kg}^{-1}$ ) than the other two  
167 sites with 158 and 147 mg Zn per kg litter for the OM and OR sites, respectively, that did not  
168 differ (Table 1). Copper concentrations in litter were significantly ( $F_{2,10}=6.27$ ,  $p<0.01$ ) higher  
169 at the OM site ( $55.54 \text{ mg kg}^{-1}$ ), but did not differ between OH and OR ( $20.4$  and  $8.19 \text{ mg k}^{-1}$ ,  
170 respectively) (Table 1). The concentration gradient of iron followed that of zinc, however,

171 with lower concentrations ( $F_{2,12}=229$ ,  $p<0.0001$ ) (Supplement 2). Manganese had a counter  
172 gradient with highest concentrations at the reference site and lower ones at the polluted sites  
173  $H_{2,12}=12.5$ ,  $p<0.01$ ). The other elements (except Na) vary significantly among sites but with  
174 difference between all sites (K, Ca) or between OH and OR or OM (Mg, P) (Supplement 2).  
175 The significant differences in carbon and nitrogen concentrations were between OR and OM  
176 (C,  $F_{2,12}=4.23$ ,  $p<0.05$ ) and between all sites (N,  $F_{2,12}=184$ ,  $p<0.0001$ ).  
177 At the Głogów transect litter concentrations of copper decreased with distance from the  
178 smelter (Table 1), however, only GH differed significantly from the other two sites  
179 ( $F_{2,12}=7.29$ ,  $p<0.05$ ), with a concentration of 77.1 mg kg<sup>-1</sup> the GM and GR site (24.8 and 13.9  
180 mg kg<sup>-1</sup> respectively) and the two last ones did not differ from one another. Zinc  
181 concentration in litter from the Głogów transect was significantly lower only in GM site than  
182 in GH and GR ( $F_{2,12}=6.7$ ,  $p<0.05$ ). Insignificant were differences in litter concentration of C  
183 and Na. The other elements significantly varied between sites: GH from GM,GR (N, Ca) or  
184 GR from GM, GH (Mg, P, K, Ca, Mn) (Supplement 2).

185

#### 186 Elemental composition of trophic groups

187 Differences in elemental composition have been found between trophic groups at all the sites  
188 studied (Suppl. 2). The statistically significant differences were noted between litter and  
189 animals (especially predators) and among trophic groups - feeding on plant material  
190 (herbivores, detritivores) and those feeding mainly on other animals (omnivores, predators),  
191 but no particular pattern was observed (Suppl. 2). Significantly lower concentrations in litter  
192 than in animals were noted for N, Na, P, K and higher for Fe. The patterns for C, Mg, Cu and  
193 Zn were related to study site and transect.

194 The differences between herbivores, detritivores, omnivores and predators varied between  
195 particular elements and the sites studied (Suppl. 2). Looking at nitrogen, significantly higher  
196 was the concentration of this element in omnivores than herbivores and detritivores (sites  
197 OM-  $F_{3,44}=12.8$ ,  $p<0.001$  and OR - ( $F_{3,66}=7.6$ ,  $p<0.001$ ), but in OH and Głogów transects no  
198 significant differences were found. In phosphorus concentration the significant difference  
199 was found only in OR – detritivores were richer than predators ( $F_{3,66}=6.3$ ,  $p<0.001$ ). Clear  
200 pattern was observed in sodium concentration: litter < herbivores < detritivores < omnivores  
201 < predators. Significant differences between consumers were found: herbivores and  
202 omnivores/predators (OH -  $F_{3,66}=55.3$ ,  $p<0.0001$ , OM -  $F_{3,66}=3.5$ ,  $p<0.05$ ),  
203 detritivores/herbivores and predators, herbivores and omnivores (OR -  $F_{3,67}=32.7$ ,  $p<0.0001$ ),  
204 herbivores and omnivores/predators (GM -  $F_{3,66}=8.8$ ,  $p<0.001$ ), (Suppl. 2)



205 The PCA in some cases separated trophic groups (Fig.1) and first and second axes explain 61  
206 (OR, OM), 60 (OH, GR), 67 (GM) and 77 (GH) percent of variance. In all sites studied litter  
207 samples create a group separate from consumers. In OR first axis and in OM second axis  
208 separate clearly herbivores and detritivores from omnivores and predators. However it is  
209 clear that composition of slugs, Isopods and Diplopods differs from those of beetles and  
210 spiders or ants. At all studied sites the positions of herbivorous species like *Arion fuscus*  
211 (slug) and both *Amara aenea* and *Hylobius abietis* (beetles) are placed separately on graph.  
212 Stoichiometry of trophic groups

213 At all six study sites element ratios in litter were significantly distinct from these in  
214 invertebrates with a higher C:N, C:Na, C:P, C:K ratio and lower C:Mg, C:Ca and C:Fe ratios.  
215 The N:P ratio show some differences between trophic groups achieving the highest values  
216 for detritivores (OH, OM) or the highest for herbivores (GH, GM), however the differences  
217 between groups were not significant. We calculated the resource:consumer ratios for the N:P  
218 to check if studied trophic groups on transects are N limited or P limited. The ratio was  
219 calculated for litter as a food source for detritivores and herbivores, and for detritivores and  
220 herbivores as a food source for predators. Almost all values were below 1, only in some cases  
221 above 1, but the results were insignificant. It suggests that the trophic groups are rather N  
222 limited and not P limited.

223

224 Comparison of trophic groups between sites on transects.

225 Elemental composition of particular trophic groups was compared on transects Olkusz  
226 transect (between OH, OM, OR) and Głogów transect (between GH, GM, GR).  
227 Multivariate ANOVA shows that in Olkusz transect significant differences in elemental  
228 composition were both between sites ( $F_{22}=194$ ,  $p<0.0001$ ) and between trophic groups  
229 ( $F_{44}=373$ ,  $p<0.0001$ ). On Olkusz transect herbivores differed significantly in the  
230 concentrations of Na, Mg, P, K, Ca, Mn and Fe, however for Mn a significant difference was  
231 between OH and OR only, and in other elements significant differences were between OH,  
232 OR and OM. Significant differences in concentrations of Zn and Cu were observed in Olkusz  
233 transect only in predators: Zn – OH from OM, OR ( $F_{3,59}=11.7$ ,  $p<0.0001$ ), Cu – OH from  
234 OR ( $F_{3,59}=5.7$ ,  $p<0.01$ ). In Głogów transect Multivariate ANOVA shows that significant  
235 differences in elemental composition were both between sites ( $F_{22}=94$ ,  $p<0.01$ ) and between  
236 trophic groups ( $F_{44}=188$ ,  $p<0.0001$ ). However looking at particular elements within trophic  
237 groups the significant differences were found only in Cu concentration between omnivores

238 from GM and GR ( $F_{2,3}=14.4$ ,  $p<0.005$ ) and in Mn between predators from GM and both  
239 GH,GR ( $F_{2,30}=7.97$ ,  $p<0.05$ ).

240 Compared were C:N and N:P ratios for particular trophic groups along pollution gradients  
241 (Olkusz Forest and Głogów Forest), but obtained results did not bring conclusive findings.  
242 In herbivores statistically significant difference were found in C:Zn ratio (between OH and  
243 OM,  $F_{2,19}=6.70$ ,  $p<0.05$ ). Comparing only C:Zn between OH and OR there was significant  
244 difference ( $F_{1,33}=16.0$ ,  $p<0.00$ ) with higher ratio in OR. Detritivores differed in ratios C:Cu  
245 ( $F_{2,50}=3.2$ ,  $p<0.05$ , OM from OH,OR) and C:Zn ( $F_{2,59}=4.7$ ,  $p<0.05$ , OM from OH,OR). On  
246 the Głogów transect no significant differences between sites for particular trophic groups  
247 have been found.

248 Trophic groups in beetles

249 Taking into account the differences in body composition of particular taxa creating  
250 one trophic group, only Coleoptera were considered. Results of PCA (Fig. 2) show that there  
251 are differences in body composition between species within one trophic group. It is clearly  
252 visible on graphs for OH and GM where two herbivores *A. aenaea* and *H. abietis* are  
253 separated one from another, and *C. nemoralis* segregates from other predatory beetles (OH).

254

255 Faunal composition and abundance

256 The studied transects differed in taxonomic richness, diversity and abundance of litter  
257 dwelling invertebrates. Generally, the Olkusz sites were more densely populated than the  
258 Głogów sites; at the Olkusz sites on average 2992 individuals per site were sampled, whereas  
259 at the Legnica sites only 555 individuals per site on average were captured. Corresponding to  
260 the higher abundance, the taxonomic richness found at the Olkusz sites was higher than that  
261 at the Głogów sites (averages of 19 and 14 taxonomic groups per site, respectively). Most  
262 abundant at almost all sites were Formicidae accounting for more than 60% of the  
263 individuals. Only in OR dominant were Carabidae.

264

## 265 Discussion

266 In the present study litter on polluted sites was enriched with Zn or Cu as a result of industrial  
267 pollution in doses which cause the concentrations exceeding maximum permissible  
268 concentrations in soil ( $40 \text{ mg} \times \text{kg}^{-1}$  for Cu and  $160 \text{ mg} \times \text{kg}^{-1}$  for Zn, Crommentuijn et al.,  
269 2000), what was expected to affect body composition and stoichiometry of consumers living  
270 there. Observed were significant differences in both pollutants concentration in litter on  
271 transects both in Olkusz Forest (Zn) and Głogów Forest (Cu). In the studied transects the



272 sites differed not only in concentrations of Zn and Cu in litter, but in the concentrations of  
273 other elements as well, as it has been shown in the analysis performed. It is an unavoidable  
274 problem of all field studies because a uniform quality and composition of litter is may be  
275 available possible only in laboratory experiments. In the field always numerous factors cause  
276 differences between sites.

277         Dead organic matter on the forest floor is consumed by detritivores and omnivores  
278 (feeding on mixed animal and plant material) and these both groups as well as herbivores  
279 constitute the prey of predators (Chen and Wise, 1999; Ponsard and Ardit, 2000; Scheu and  
280 Falca, 2000). The litter quality and environmental conditions affect density and diversity of  
281 litter organisms (Dyer and Letourneau, 2003), as well as C:X ratios and interaction between  
282 elements in the trophic web (Ott et al., 2014). The higher abundance and diversity of litter  
283 fauna in Olkusz Forest than in Głogów Forest was probably the result of environmental  
284 conditions: lower precipitation in Głogów region as well as a thinner litter layer what creates  
285 inconvenient conditions for the organisms living there.

286         The body tissues of organisms are built of approximately 25 chemical elements  
287 (Sterner and Elser, 2002; Kaspari et al., 2016) and tissues of plants and animals differ in  
288 content of proteins, carbohydrates and lipids. The differences observed are similar in  
289 elemental composition and stoichiometry. Literature data suggest that animals feeding on  
290 food poor in some elements will have lower concentration of these elements than those  
291 feeding on a richer food. Therefore herbivores and detritivores should have lower  
292 concentration of N and P in their bodies than predatory species (Elser et al., 2000; Fagan et  
293 al., 2002; Fagan and Denno, 2004; Feijoó et al., 2014; Gonzalez et al., 2011; Lemoine et al.,  
294 2014). Similarly to the data cited above in Olkusz Forest the concentrations of N were higher  
295 in predatory and omnivorous taxa than in first order consumers and detritus. However our  
296 results for P do not confirm observations of other authors. The highest concentration of P was  
297 found in various trophic groups in studied sites. A possible explanation is that the differences  
298 exist in taxonomical composition of trophic groups in studied sites. The herbivores included  
299 beetles (*A. aenea*, *H. abietis*) as well as Gastropoda (*Ar. fuscus*). The group of detritivores  
300 included beetles, Isopoda and Diplopoda, the omnivores were beetles, harvestman and ants  
301 while the predator group was composed of beetles, spiders and chilopods. The taxa such as  
302 gastropods, chilopods and especially isopods and diplopods contain high concentrations of P  
303 and Ca. Therefore its share in trophic group may have affected pattern of trophic group  
304 differences in the transect studied. Impact may have additionally differentiation in body size  
305 of animals within trophic groups, since the literature data bring information on negative

306 allometry between P and body mass (Woods et al. 2004, Hambäck et al. 2009). Because of  
307 the above results we decided to limit taxonomical diversity and only Coleoptera were taken  
308 into analyses. Our results of PCA (Fig 2) show that still some herbivorous beetles (*A.aenea*  
309 and *H. abietis*) are differently positioned in the multidimensional space, as shown on the  
310 graph (Fig. 2). The results seem to support the thesis on importance of taxonomical identity  
311 over trophic group (Gonzalez et al., 2011, 2018). As it has been highlighted by Gonzalez et al  
312 (2011) the phylogeny may exert significant influence on the results for trophic groups.  
313 Taxonomy explains most of the variance in elemental composition, and there is strong  
314 dependency of macroinvertebrate stoichiometry on taxonomy and trophic group (Gonzalez et  
315 al 2018).

316 The topic of interest in our study was if metal pollution affect ratios among elements  
317 e.g. C:N or N:P. According to Sardans et al. (2012) the ratios between two main elements,  
318 carbon and nitrogen, differ between particular trophic groups:  $C:N_{plants} \gg C:N_{herbivores} >$   
319  $C:N_{predators}$ . In our results the changes in the C:N ratios were decreasing as trophic level  
320 increased, the C:N ratio in litter was 10 fold higher than in detritivores. Similarly, Bradshaw  
321 et al. (2012) found that within one trophic link all interactions have similar elemental  
322 patterns. In our study the C:N ratio in predators was similar to (or lower than) in herbivores,  
323 because this animals feed on source reach in necessary elements (Gonzalez et al., 2018).  
324 Detritivores are feeding on food with C:N ratio ten times higher than its body, and higher  
325 C:Na, C:P, C:K ratios in litter, what suggest that these animals can be confronted with  
326 “stoichiometric mismatch” and their food should be supplemented from other sources  
327 (Filipiak and Weiner, 2014, 2016). Therefore detritivores as well as herbivores complement  
328 elements in shortage in their food by overfeeding or compensatory feeding (Sterner and  
329 Elser, 2002). We hypothesized that animals living in metals polluted sites will have lower  
330 C:N ratio because C is related with lipid storage, and costs of detoxification will result in  
331 smaller fat reserves. However such relation was not found. With similar observation yielded  
332 study on *P. oblongopunctatus* in Olkusz transect. Zygmunt et al. (2006) did not found  
333 significant trend in body caloric value on pollution transect.  
334 The N:P ratio did not differ either between trophic groups or study sites. The calculated  
335 resource:consumer N:P ratio suggests that invertebrates in the forests studied are N limited  
336 and not P limited what is consistent with other data (Lemoine et al., 2014).  
337 To our knowledge this is the first study that describes the elemental differences between  
338 trophic groups in a terrestrial detritivore food web both with and without the presence of  
339 metal pollution. As expected, litter was poor in elements such as nitrogen and phosphorus.

340 Further, similar element ratios of the different trophic groups of invertebrates at the different  
341 sites suggests that metal pollution has little effect on the overall elemental balance in  
342 terrestrial detritivorous macro-invertebrate food webs.

343

#### 344 **Acknowledgements**

345 The authors would like to thank the Polish Foundation for Sciences (grant: MPD/2009-3/5/)  
346 for their financial support and the Polish National Science Centre (grant:  
347 2012/05/N/NZ8/00985).

348

349

#### 350 **References**

- 351 Boros, G., Sály, P., Vanni, M.J., 2015. Ontogenetic variation in the body stoichiometry of  
352 two fish species. *Oecologia*, 179, 239-341
- 353 Bradshaw, C., Kautsky, U., Kumblad, L., 2012. Ecological stoichiometry and multi-  
354 elemental transfer in a coastal ecosystem. *Ecosystems* 15, 591-603.
- 355 Cease, A.J., Elser, J.J., 2013. Biological stoichiometry. *Nature Education Knowledge* 4, 15
- 356 Chen, B., Wise, D.H., 1999. Bottom-up limitation of predaceous arthropods in a detritus-  
357 based terrestrial food web. *Ecology* 80, 761-771.
- 358 Chen, S., Sun, L., Sun, T., Chao, L., Guo, G., 2007. Interaction between cadmium, lead and  
359 potassium fertilizer (K<sub>2</sub>SO<sub>4</sub>) in a soil-plant system. *Environ. Geochem. Health* 29, 435–446.
- 360 Chodak, M., Gołębiewski, M., Morawska-Płoskonka, J., Kuduk, K., Niklińska, M., 2013.  
361 Diversity of microorganisms from forest soils differently polluted with heavy metals. *Appl.*  
362 *Soil Ecol.* 64, 7–14.
- 363 Crommentuijn, T., Slijm, D., De Bruin, J., an den Hoop, M., van Leeuwen, K., van de  
364 Plassche, E., 2000. Maximum permissible and negligible concentrations for metals and  
365 metalloids in the Netherlands, taking into account background concentrations. *J. Environ.*  
366 *Manage.* 60, 121-143.
- 367 Donker, M.H., Zonneveld, C., van Straalen, N.M., 1993. Early reproduction and increased  
368 reproductive allocation in metal-adapted populations of the terrestrial isopod *Porcellio*  
369 *scaber*. *Oecologia* 96, 316–323.
- 370 Dyer, L.A., Letourneau, D., 2003. Top-down and bottom-up diversity cascades in detrital vs.  
371 living food webs. *Ecol. Lett.* 6, 60-68.

- 372 El-Danasoury, H., Cerecedo, C., Córdoba, M., Iglesias-Piñero, J., 2017. Predation by the  
373 carabid beetle *Harpalus rufipes* on the pest slug *Deroceras reticulatum* in the laboratory.  
374 *Ann. Appl. Biol.* 170, 251–262.
- 375 Elser, J.J., Sterner, R.W., Gorokhova, E. et al. 2000. Biological stoichiometry  
376 from genes to ecosystems. *Ecol. Lett.*, 3, 540–550.
- 377 Fagan, W.F., Siemann, E., Mitter, C., Denno, R.F., Huberty, A.F., Woods, H.A. et al. 2002.  
378 Nitrogen in insects: implications for trophic complexity and species diversification. *Am. Nat.*  
379 160, 784–802.
- 380 Fagan, W.F., Denno, R.F., 2004. Stoichiometry of actual vs. potential predator–prey  
381 interactions: insights into nitrogen limitation for arthropod predators. *Ecol. Lett.* 7, 876–883.
- 382 Feijoó, C., Leggieri, L., Ocón, C., Muñoz, I., Capítulo A.R., Giorgi, A., Colautti, D., Ferreiro,  
383 N., Licursi, M., Gómez, N., Sabater, S., 2014. Stoichiometric homeostasis in the food web  
384 of a chronically nutrient-rich stream. *Freshw. Biol.* 33, 820–831.
- 385 Filipiak, M., Weiner, J., 2014. How to make a beetle out of wood: multi-elemental  
386 stoichiometry of wood decay, xylophagy and fungivory. *PlosONE*,  
387 [doi.org/10.1371/journal.pone.0115104](https://doi.org/10.1371/journal.pone.0115104)
- 388 Filipiak, M., Sobczyk, Ł., Weiner, J., 2016. Fungal transformation of tree stumps into a  
389 suitable resource for xylophagous beetles via changes in elemental ratios. *Insects*, 7, 13.
- 390 Gall, J.E., Boyd, R.S., Rajakaruna, N., 2015. Transfer of heavy metals through terrestrial  
391 food webs: a review. *Environ. Monit. Assess.* 187, 201.
- 392 González, A.L., Fariña, J.M., Kay, A.D., Pinto, R., Marquet, P.A., 2011. Exploring patterns  
393 and mechanisms of interspecific and intraspecific variation in body elemental composition of  
394 desert consumers. *Oikos* 120, 1247–1255.
- 395 González, A.L., Céréghino, R., Dézerald, O., Farjalla, V.F., Leroy, C., Richardson, B.A.,  
396 Richardson, M.J., Romero, G.Q., Srivastava, D.S., 2018. Ecological mechanisms and  
397 phylogeny shape invertebrate stoichiometry: A test using detritus-based communities across  
398 Central and South America. *Funct. Ecol.* 32, 2448–2463.
- 399 Hambäck, P.A., Gilbert, J., Schneider, K., Martinson, H.M., Kolb, G., Fagan, W.F., 2009.  
400 Effects of body size, trophic mode and larval habitat on Diptera stoichiometry: a regional  
401 comparison. *Oikos* 118, 615–623.
- 402 Heinrichs, H., Brumsack, H-J., Löffel, N., König, N., 1986. Verbessertes  
403 Druckaufschlußsystem für biologische und anorganische Materialien. *Z. Pflanzenernähr.*  
404 *Bodenk.* 149, 350–353.

- 405 Hessen, D.O., Ågren, G.I., Anderson, T.R., Elser, J.J., De Ruiter, P.C., 2004. Carbon  
406 sequestration in ecosystems: the role of stoichiometry. *Ecology* 85, 1179-1192.
- 407 Karimi, R., Folt, C.L., 2006. Beyond macronutrients: element variability and multielement  
408 stoichiometry in freshwater invertebrates. *Ecol. Lett.* 9, 1273–1283.
- 409 Kaspari, M., Powers, J.S. 2016. Biogeochemistry and geographical ecology: embracing all  
410 twenty-five elements required to build organisms. *Am. Nat.* 188, S62–S73.
- 411 Larochelle, A. 1990. The food of carabid beetles. *Faberies Suppl.* 5, 1-132.
- 412 Lemoine, N.P., Giery, S.T., Burkepille, D.E., 2014. Differing nutritional constraints of  
413 consumers across ecosystems. *Oecologia* 174, 1367–1376.
- 414 Lin, S-L., Wu, L., 1994. Effects of copper concentration on mineral nutrient uptake and  
415 copper accumulation in protein of copper-tolerant and nontolerant *Lotus purshianus* L..  
416 *Ecotoxicol. Environ. Saf.* 29, 214-228.
- 417 Lindeman, R.I., 1942. The trophic dynamic aspect of Ecology. *Ecology* 23, 399-418.
- 418 Liu, J., Li, K., Xu, J., Liang, J., Lu, X., Yang, J., Zhu, Q., 2003. Interaction of Cd and five  
419 mineral nutrients for uptake and accumulation in different rice cultivars and genotypes. *Field*  
420 *Crops Res.* 83, 271-281.
- 421 Łagisz, M., Laskowski, R., 2007. Susceptibility of a Carabid Beetle, *Pterostichus*  
422 *blongopunctatus* Fab., from a gradient of heavy metal pollution to additional stressors. *Bull.*  
423 *Environ. Contam. Toxicol.* 79, 504–507.
- 424 Niklińska, M., Chodak, M., Laskowski, R., 2005. Characterization of the forest humus  
425 microbial community in a heavy metal polluted area. *Soil Biol. Biochem.* 37, 2185-2194.
- 426 Niklińska, M., Chodak, M., Laskowski, R., 2006. Pollution-induced community tolerance of  
427 microorganisms from forest soil organic layers polluted with Zn or Cu. *Appl. Soil Ecol.* 32,  
428 265–272.
- 429 Ott, D., Digel, C., Klarner, B., Maraun, M., Pollierer, M., Rall, B.C., Scheu, S., Seelig, G.,  
430 Brose, U., 2014. Litter elemental stoichiometry and biomass densities of forest soil  
431 invertebrates. *Oikos* 123, 1112–1223.
- 432 Peng, K.J., Luo, C.L., You, W.X., Lian, C.L., Li, X.D., Shen, Z.G., 2008. Manganese uptake  
433 and interactions with cadmium in the hyperaccumulator – *Phytolacca Americana* L. J.  
434 *Hazard. Mater.* 154, 674–681.
- 435 Ponsard, A., Ardit, R., 2000. What can stable isotopes ( $\delta^{15}\text{N}$  and  $\delta^{13}\text{C}$ ) tell about the food  
436 web of soil macro-invertebrates? *Ecology* 81, 852-864.

- 437 Rožen, A., 2006. Effect of cadmium on life-history parameters in *Dendrobaena octaedra*  
438 (*Lumbricidae: Oligochaeta*) populations originating from forests differently polluted with heavy  
439 metals. *Soil Biol. Biochem.* 38, 489-503
- 440 Rožen, A., Sobczyk, Ł., Weiner, J., 2015. The effect of pre-analytical treatment on the results  
441 of stoichiometric measurements in invertebrates. *Appl. Entomol. Zool.* 50, 393-403.
- 442 Sardans, J., Rivas-Ubach, A., Peñuelas, J., 2012. The elemental stoichiometry of aquatic and  
443 terrestrial ecosystems and its relationships with organismic lifestyle and ecosystem structure  
444 and function: a review and perspectives. *Biochemistry* 111, 1-39.
- 445 Sariyildiz, T., Anderson, J.M., Kucuk, M., 2005. Effects of tree species and topography on  
446 soil chemistry, litter quality and decomposition in Northeast Turkey. *Soil Biol. Biochem.* 37,  
447 1695-1706.
- 448 Scheu, S., Falca, M., 2000. The soil food web of two beech forests (*Fagus sylvatica*) of  
449 contrasting humus type: stable isotope analysis of a macro- and a mesofauna-dominated  
450 community. *Oecologia* 123, 285-296.
- 451 Siedlecka, A., 1995. Some aspects of interactions between heavy metals and plant mineral  
452 nutrients. *Acta Soc. Bot. Pol.* 64, 265-272.
- 453 Stefanowicz, A.M., Niklińska, M., Laskowski, R., 2008. Metals affect soil bacterial and  
454 fungal functional diversity differently. *Environ. Contam. Toxicol.* 27, 591–598.
- 455 Sterner, R.W., Elser, J.J., 2002. *Ecological Stoichiometry: the Biology of Elements from*  
456 *Molecules to the Biosphere.* Princeton, New Jersey, USA, Princeton University Press.
- 457 Stone, D., Jepson, P., Kramarz, P., Laskowski, R., 2001. Time to death response in carabid  
458 beetles exposed to multiple stressors along a gradient of heavy metal pollution. *Environ.*  
459 *Pollut.* 113, 239–244.
- 460 Tyler, G., 1984. The impact of heavy metal pollution on forests: a case study of Gusum,  
461 Sweden. *Ambio* 13, 18-24.
- 462 Vesterdal, L., 1999. Influence of soil type on mass loss and nutrient release from  
463 decomposing foliage litter of beech and spruce. *Can. J. For. Res.* 29, 95-105.
- 464 Woods, H. A., Fagan, W.F., Elser, J.J., Harrison, J.F. 2004. Allometric and phylogenetic  
465 variation in insect phosphorus content. *Funct. Ecol.* 18, 103 – 109.
- 466 Zygmunt, P.M.S., Maryński, M., Laskowski, R., 2006. Body mass and caloric value of the  
467 ground beetle (*Pterostichus oblongopunctatus*) (Coleoptera, Carabidae) along a gradient of  
468 heavy metal pollution. *Environ. Toxicol. Chem.* 25, 2709–2714.
- 469



470 **Table 1:** Geographical location of the studied pollution transects (Głogów and Olkusz), their  
 471 distance to the smelter, concentrations of copper and zinc in litter. GH – Głogów heavily  
 472 polluted, GM - Głogów moderately polluted, GR – Głogów reference site; OH – Olkusz  
 473 heavily polluted, OM - Olkusz moderately polluted, OR – Olkusz reference site

| Site | Lat.<br>Degr.<br>Nord | Long.<br>Degr.<br>East | Distance<br>from<br>smelter<br>(km) | Zinc (mg/kg) ± SD  |   |      | Copper (mg/kg) ± SD |   |      |
|------|-----------------------|------------------------|-------------------------------------|--------------------|---|------|---------------------|---|------|
|      |                       |                        |                                     | Litter             |   |      | Litter              |   |      |
| GH   | 51°44'                | 16°1'                  | 5.8                                 | 70.4 <sup>A</sup>  | ± | 4.8  | 77.1 <sup>A</sup>   | ± | 32.5 |
| GM   | 51°44'                | 16°5'                  | 8.6                                 | 56.6 <sup>B</sup>  | ± | 15.6 | 24.8 <sup>B</sup>   | ± | 16.2 |
| GR   | 51°47'                | 16°1"                  | 11.2                                | 66.4 <sup>AB</sup> | ± | 10.0 | 13.9 <sup>B</sup>   | ± | 18.4 |
| OH   | 50°17'                | 19°29'                 | 2.5                                 | 449 <sup>a</sup>   | ± | 15.3 | 20.4 <sup>ab</sup>  | ± | 7.8  |
| OM   | 50°19'                | 19°30'                 | 3.9                                 | 158 <sup>b</sup>   | ± | 19.2 | 55.5 <sup>b</sup>   | ± | 33.8 |
| OR   | 50°32'                | 19°38'                 | 31.9                                | 147 <sup>b</sup>   | ± | 2.9  | 8.2 <sup>a</sup>    | ± | 1.1  |

474 Statistically significant differences between Głogów sites are marked with capital letters, and  
 475 between Olkusz sites with lower case letters

476

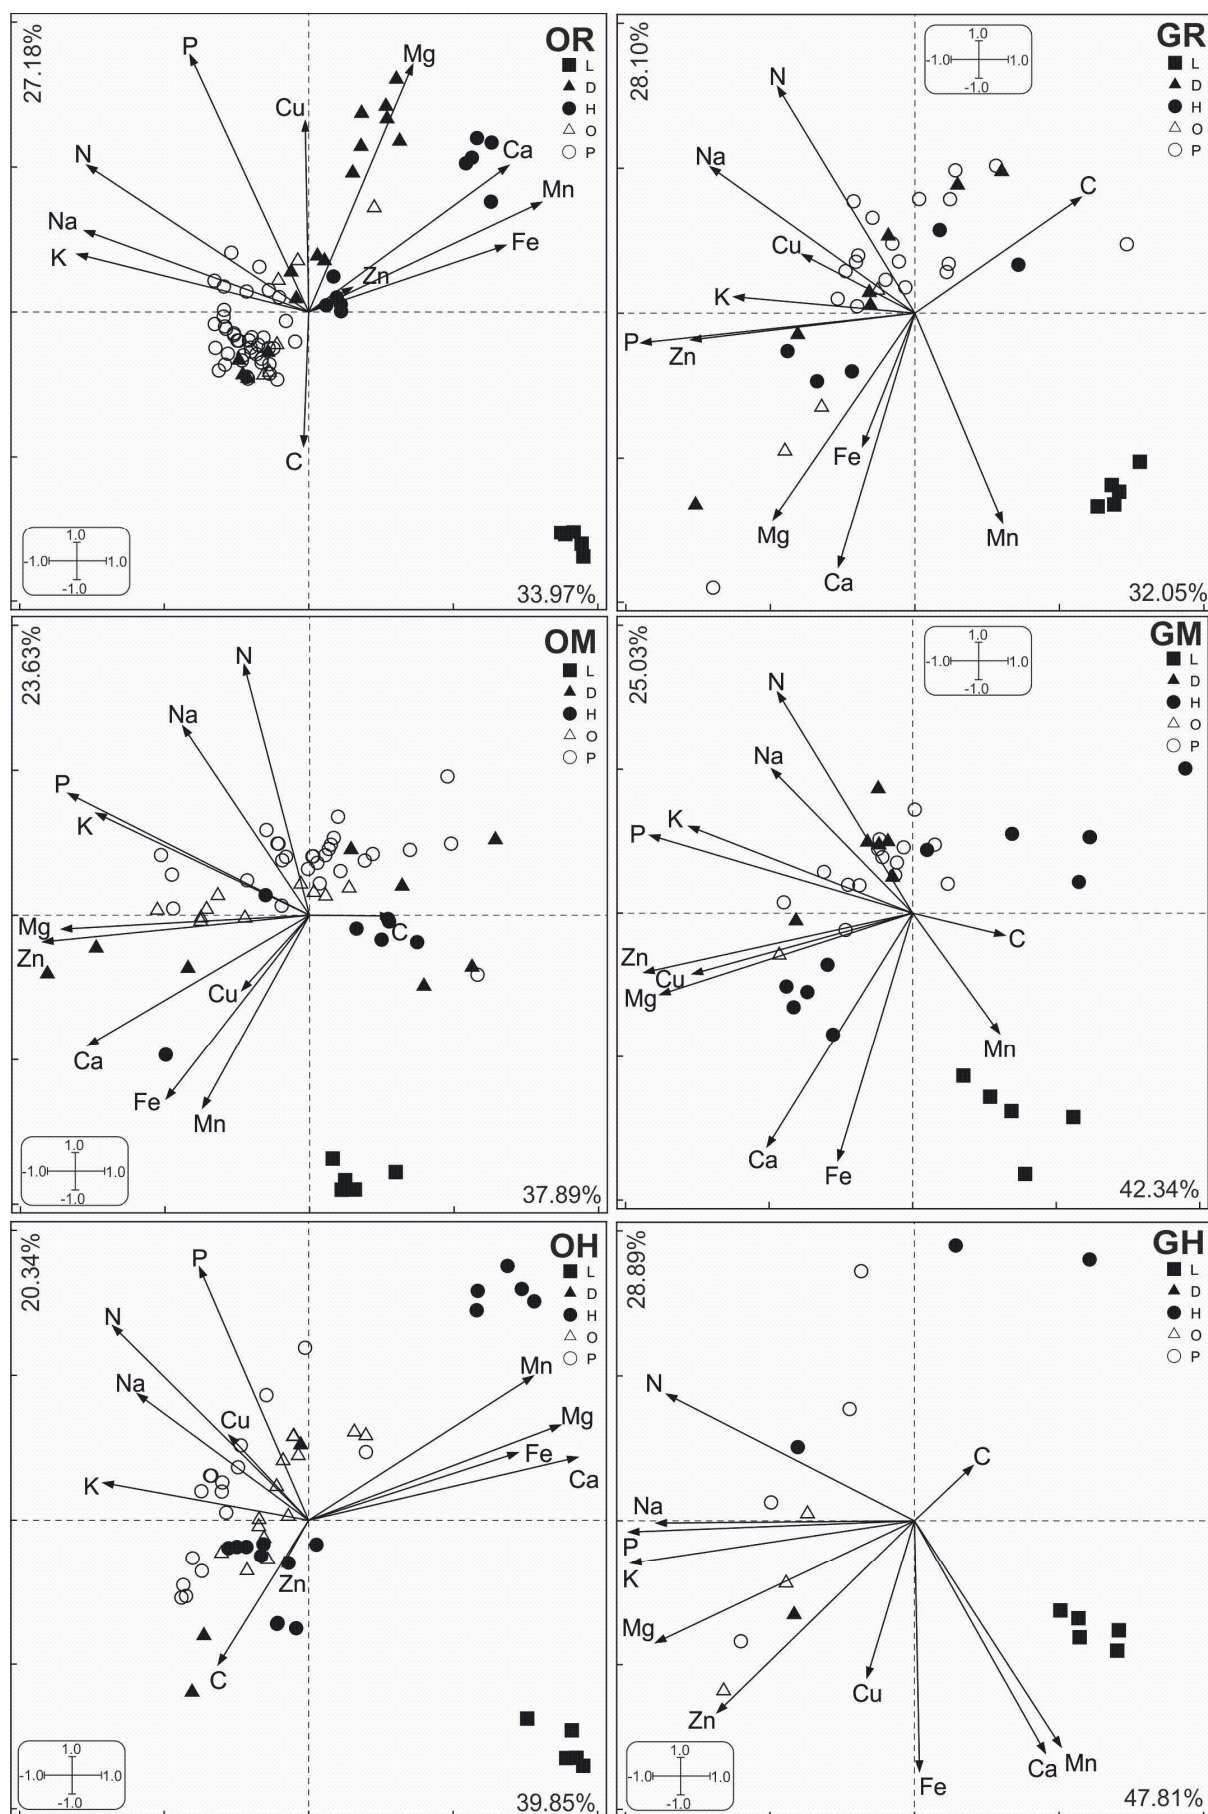

477

478 Fig. 1. PCA ordination diagrams showing the relation of: the litter (L), herbivores (H),  
479 detritivores (D), omnivores (O) and predators (P) towards one another based on their  
480 elemental concentration. The six plots represent the Legnica sites (right) and Olkusz sites  
481 (left) where: GH – Głogów heavily polluted site, GM - Głogów moderately polluted site, GR  
482 – Głogów reference site; OH – Olkusz heavily polluted site, OM - Olkusz moderately  
483 polluted site, OR – Olkusz reference site.

484

485

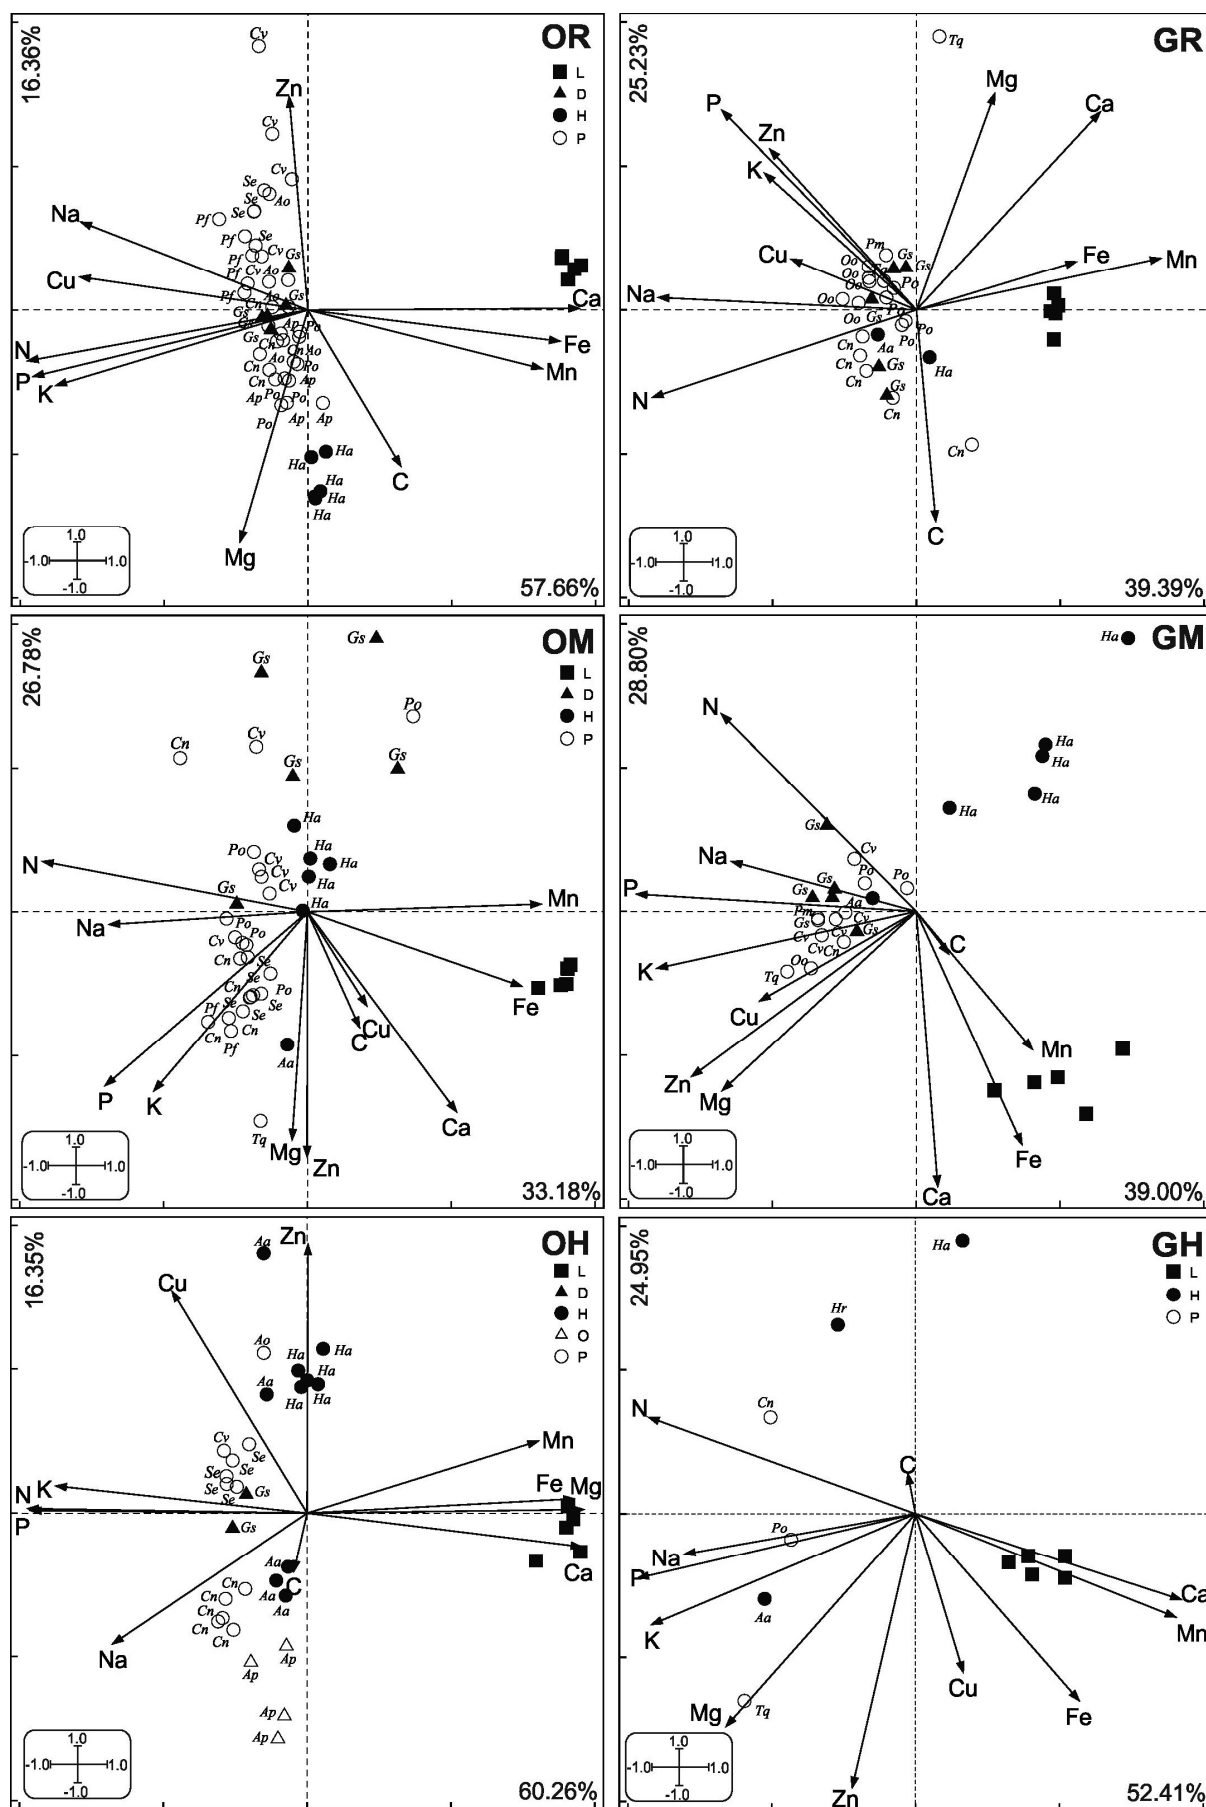

486

487 Fig. 2. PCA ordination diagrams for Coleoptera showing the relation of: the litter (L),  
488 herbivores (H), detritivores (D), omnivores (O) and predators (P) towards one another based  
489 on their elemental concentration. The six plots represent the Legnica sites (right) and Olkusz  
490 sites (left) where: GH – Głogów heavily polluted site, GM - Głogów moderately polluted  
491 site, GR – Głogów reference site; OH – Olkusz heavily polluted site, OM - Olkusz  
492 moderately polluted site, OR – Olkusz reference site. Species abbreviation in Supplement 1.

493

494
